# Supplementary material for: Formation of core–shell-structured Zn2SnO4–carbon microspheres with superior electrochemical properties by one-pot spray pyrolysis
Source: Royal Society of Chemistry journal article supplement (doi:10.1039/c4nr05373g), 2014-11-10
Supplement: c4nr05373g1.pdf [file c4nr05373g1.pdf]

## **Supporting Information**

### **Formation of core–shell-structured $\text{Zn}_2\text{SnO}_4$ –carbon microspheres with superior electrochemical properties by one-pot spray pyrolysis**

Young Jun Hong, Yun Chan Kang\*

Department of Materials Science and Engineering, Korea University, Anam-dong, Seongbuk-  
gu, Seoul 136-713, Republic of Korea

E-mail: yckang@korea.ac.kr Fax: +82-2-928-3584; Tel: +82-2-3290-3268

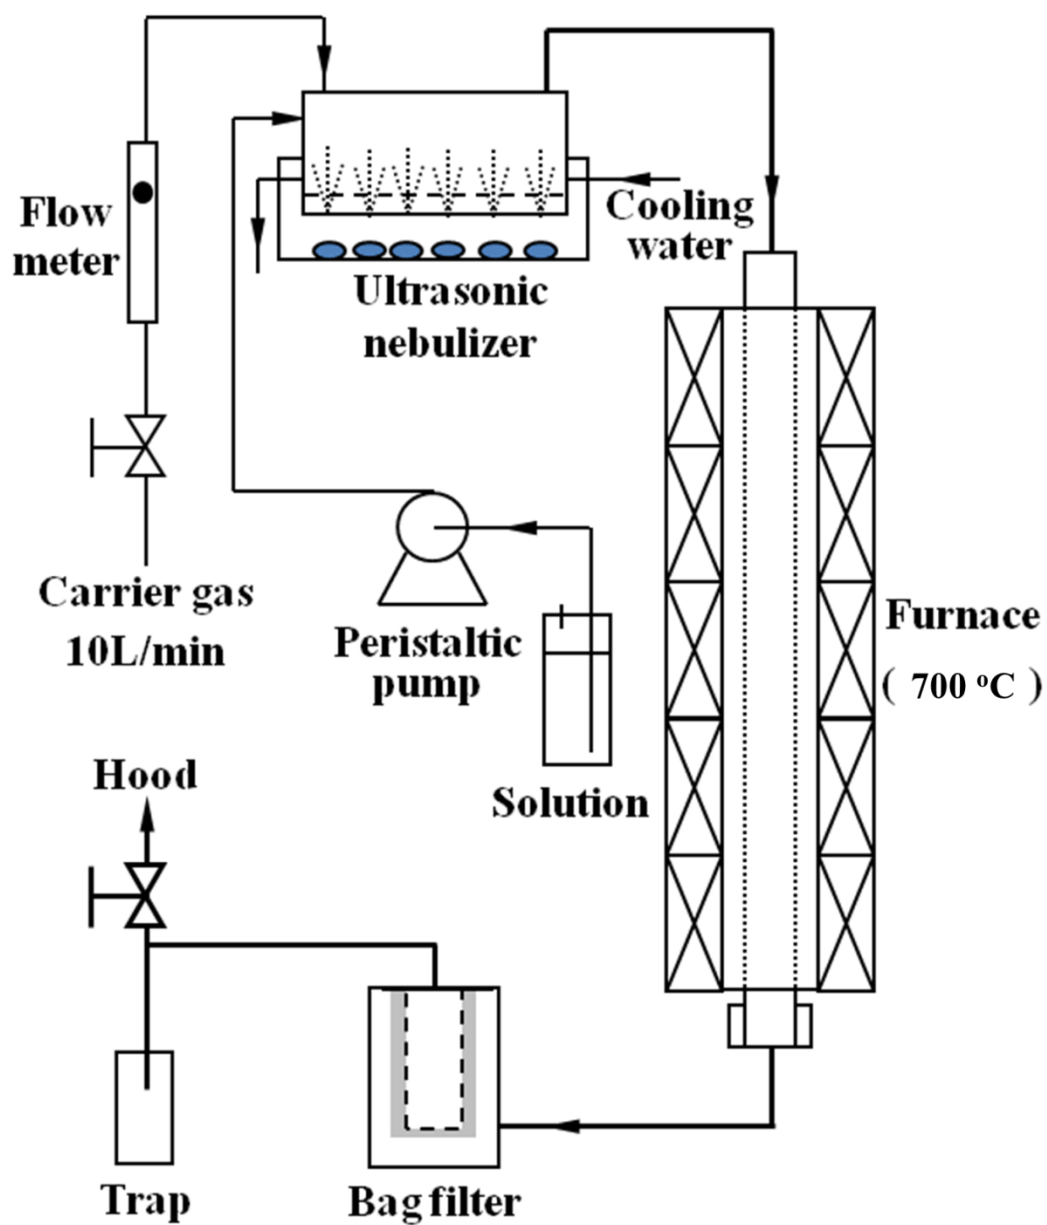

Fig. S1 Schematic diagram of ultrasonic spray pyrolysis process.

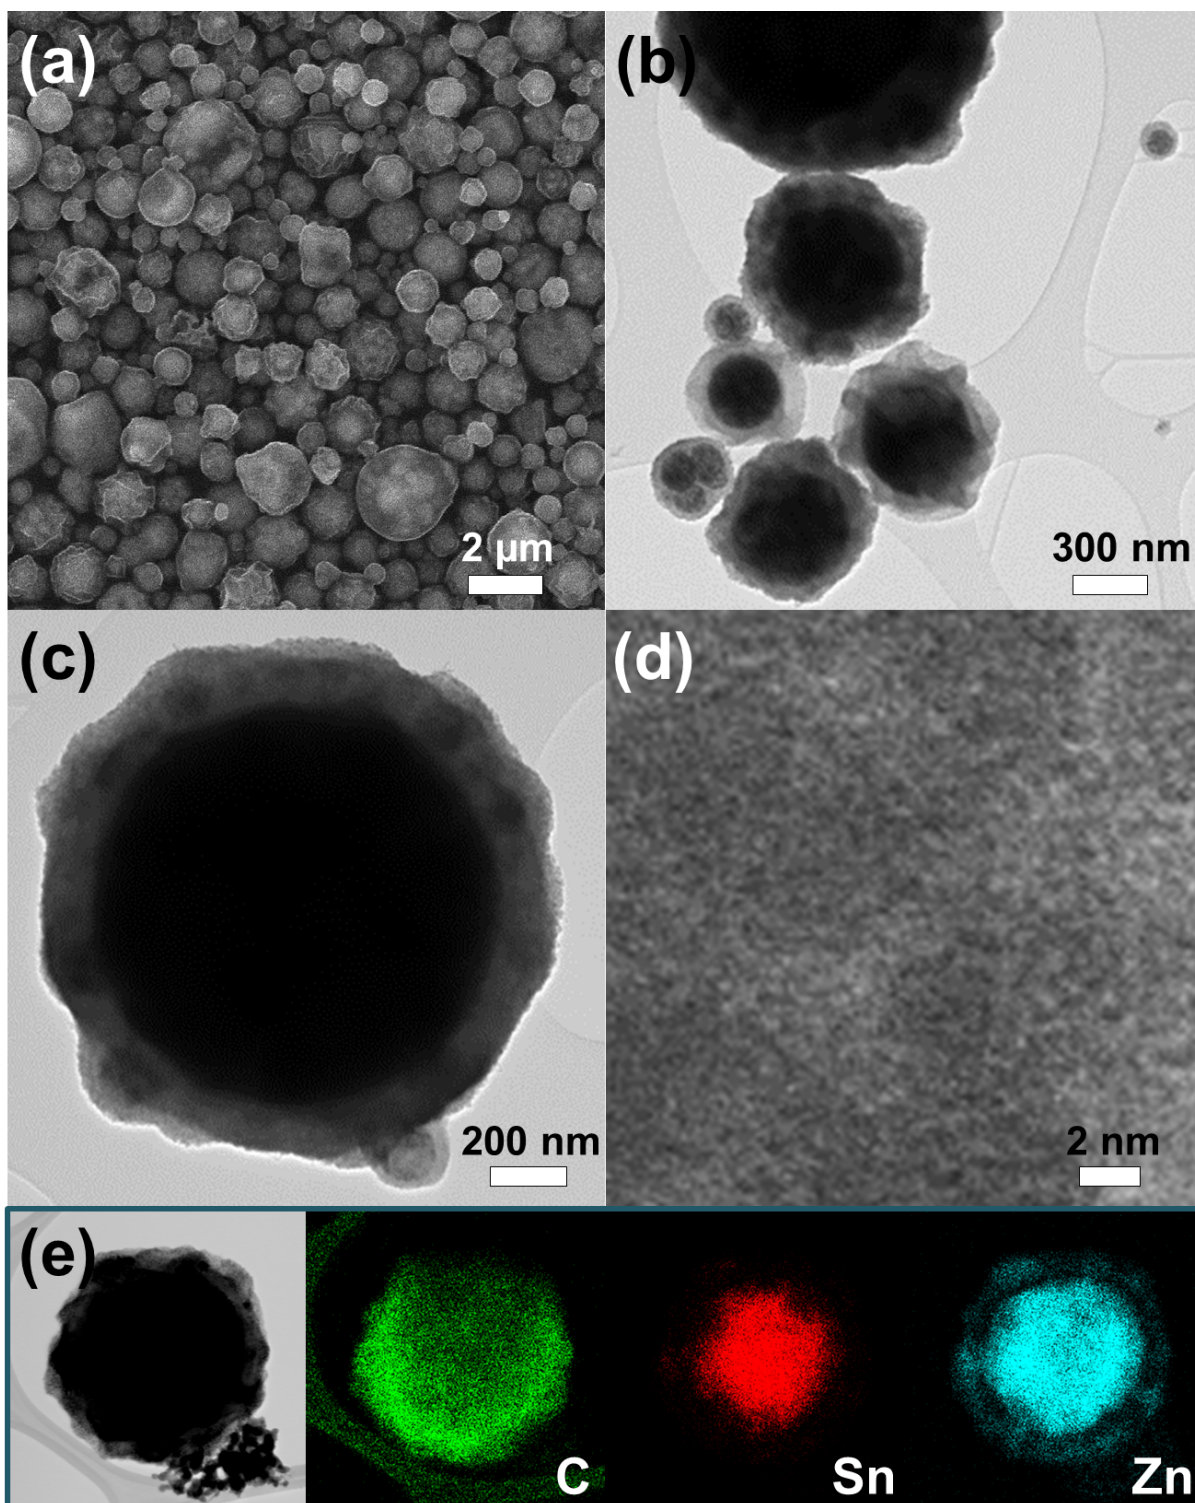

**Fig. S2** Morphologies and elemental mapping images of the  $\text{Zn}_2\text{SnO}_4$ -carbon composite microspheres prepared from the spray solution with 25 g PVP.

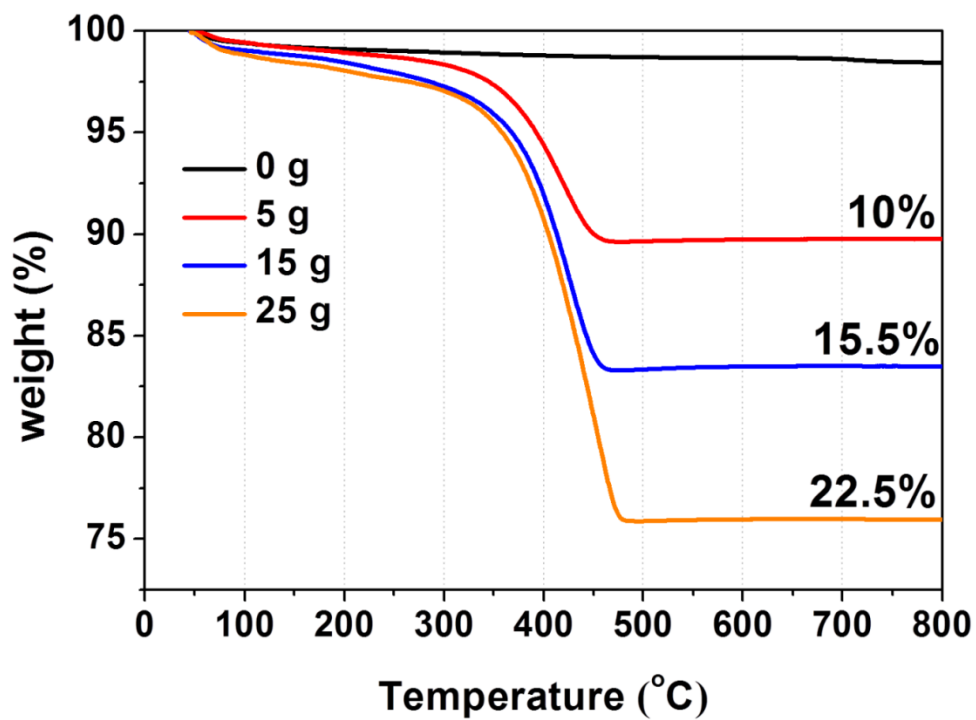

**Fig. S3** Thermogravimetric (TG) curves of the bare  $Zn_2SnO_4$  and  $Zn_2SnO_4$ -carbon composite microspheres.

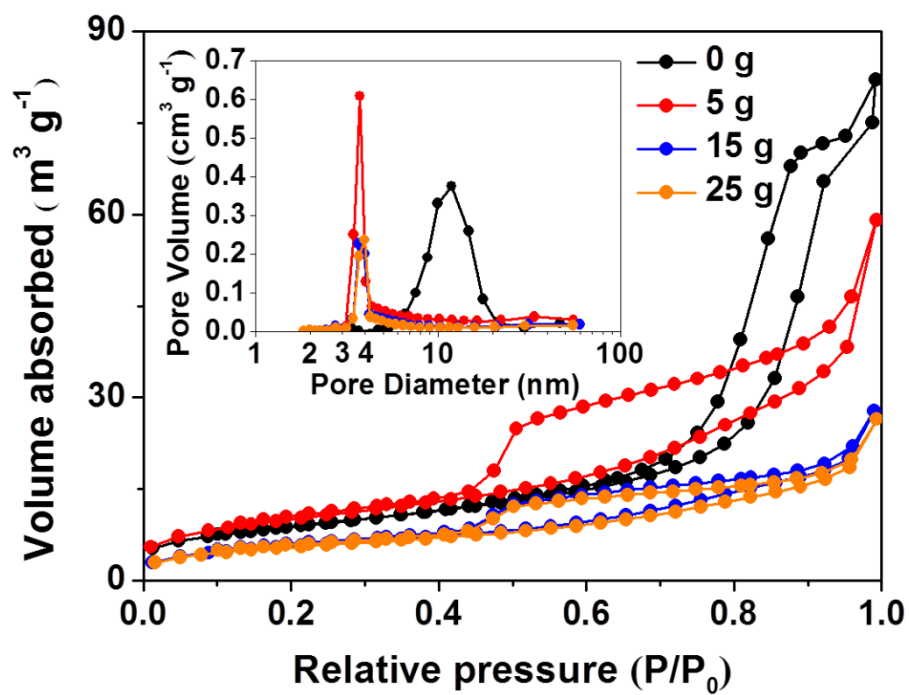

**Fig. S4** N<sub>2</sub> adsorption and desorption isotherms and the Barrett-Joyner-Halenda (BJH) pore-size distributions of the bare Zn<sub>2</sub>SnO<sub>4</sub> and Zn<sub>2</sub>SnO<sub>4</sub>-carbon composite microspheres.

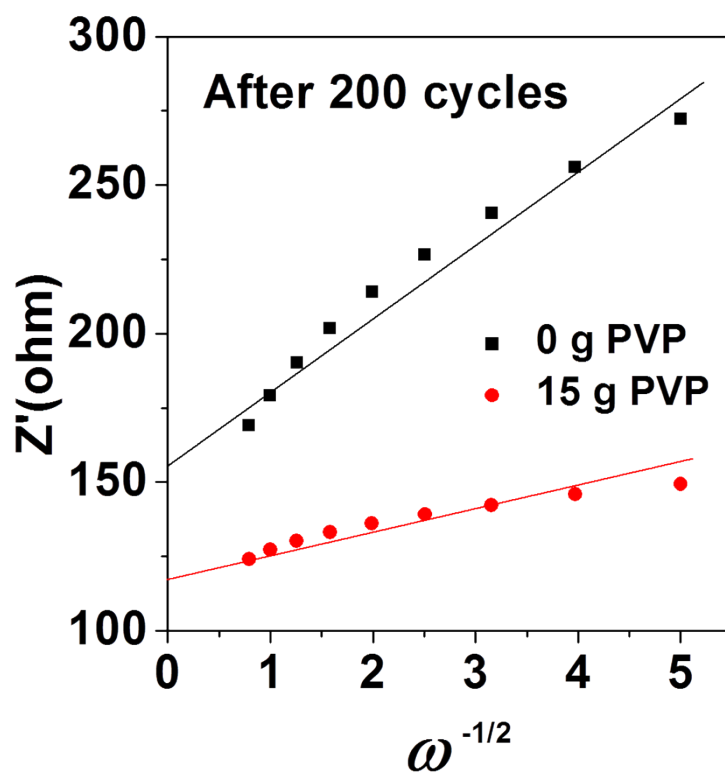

**Fig. S5** Relationship between  $Z_{re}$  and  $\omega^{-1/2}$  in the low frequency region, where  $\omega$  is the angular frequency in the low frequency region ( $\omega = 2\pi f$ ).

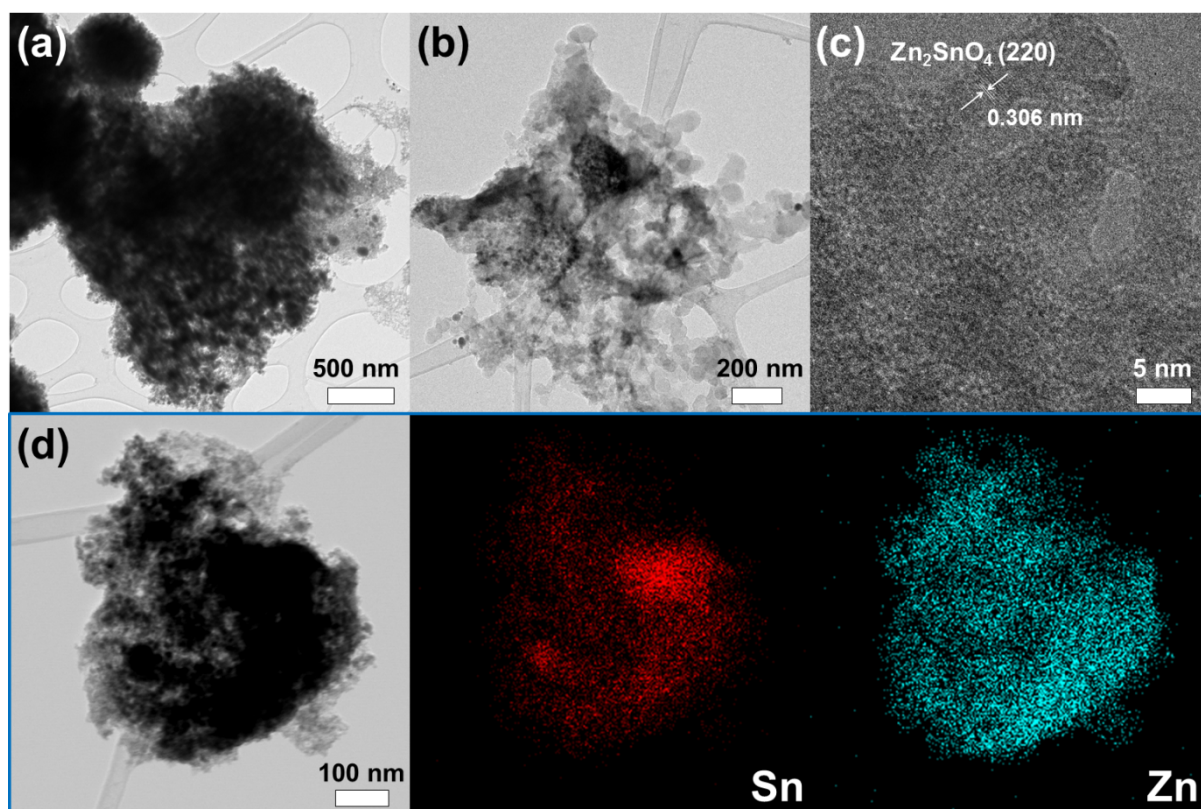

**Fig. S6** Morphologies and elemental mapping images of the bare  $Zn_2SnO_4$  microspheres after 200 cycles.

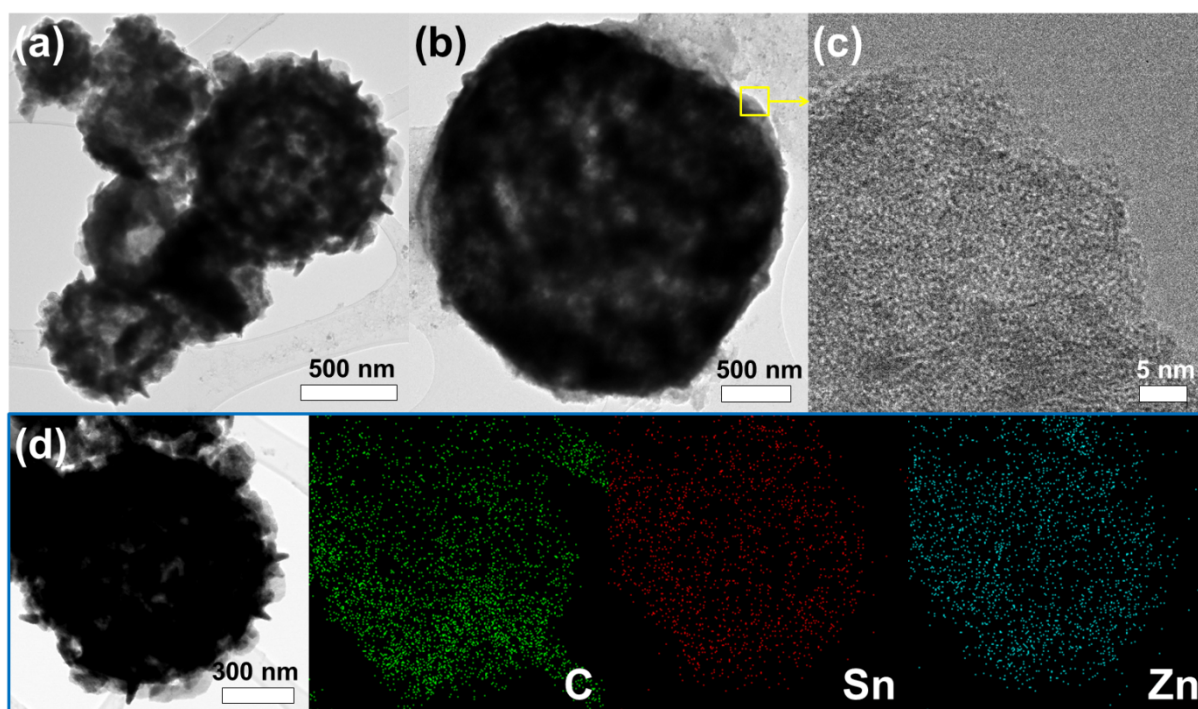

**Fig. S7** Morphologies and elemental mapping images of the  $\text{Zn}_2\text{SnO}_4$ -carbon composite microspheres prepared from the spray solution with 5 g PVP after 200 cycles.



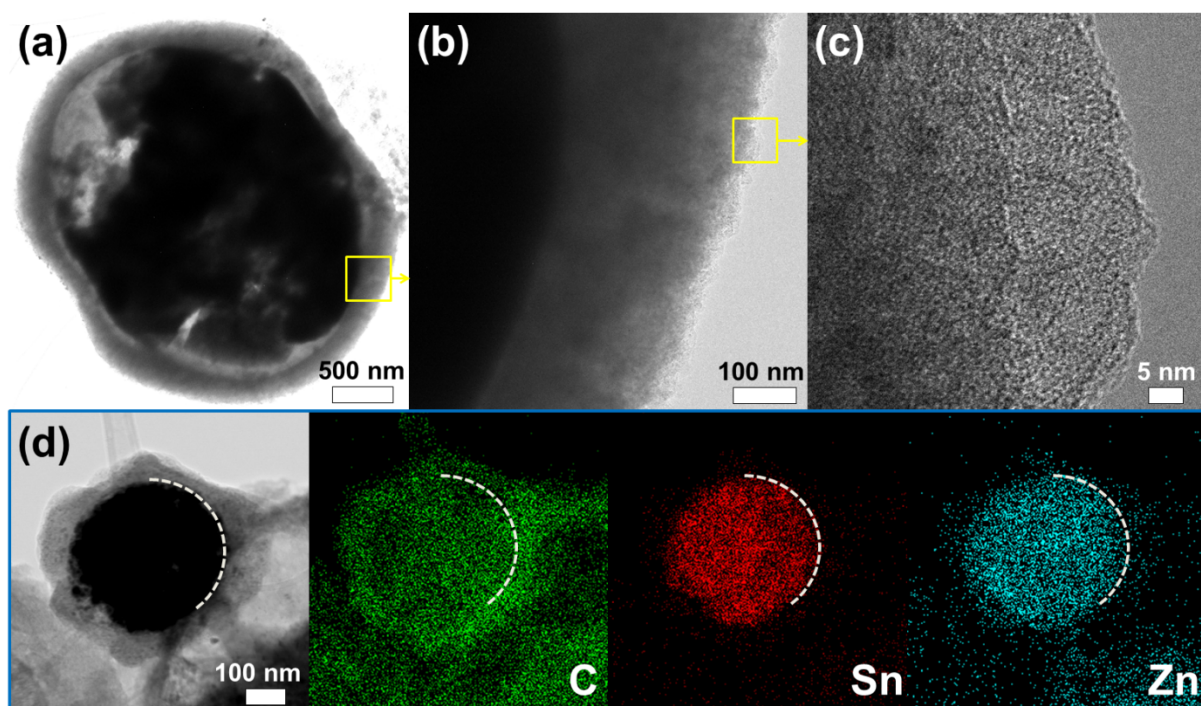

**Fig. S8** Morphologies and elemental mapping images of the Zn<sub>2</sub>SnO<sub>4</sub>-carbon composite microspheres prepared from the spray solution with 15 g PVP after 200 cycles.

**Table S1.** Electrochemical properties of Zn<sub>2</sub>SnO<sub>4</sub> materials with different morphologies prepared by various preparation methods.

| Morphology<br>[preparation method]                                                                 | Voltage<br>range [V] | Current<br>density                                                   | Initial C <sub>dis</sub> /C <sub>cha</sub><br>[mA h g <sup>-1</sup> ] | Discharge<br>capacity<br>[mA h g <sup>-1</sup> ] | Cycle<br>number | Ref.      |
|----------------------------------------------------------------------------------------------------|----------------------|----------------------------------------------------------------------|-----------------------------------------------------------------------|--------------------------------------------------|-----------------|-----------|
| Polypyrrole-coated hollow Zn <sub>2</sub> SnO <sub>4</sub> boxes<br>[microemulsion polymerization] | 0.01 – 3             | 60 mA g <sup>-1</sup>                                                | 1105.2 / 556                                                          | 478.4                                            | 50              | [10]      |
| Zn <sub>2</sub> SnO <sub>4</sub> nano boxes @graphene<br>[coprecipitation]                         | 0.01 – 2             | 300 mA g <sup>-1</sup>                                               | 1624.7 / 1121.2                                                       | 752.9                                            | 45              | [11]      |
| Zn <sub>2</sub> SnO <sub>4</sub> /graphene nanohybrid<br>[hydrothermal]                            | 0.005 – 3            | 800 mA g <sup>-1</sup> (charge)<br>50 mA g <sup>-1</sup> (discharge) | - / 711                                                               | 500                                              | 40              | [12]      |
| Octahedral Zn <sub>2</sub> SnO <sub>4</sub> -graphene<br>[hydrothermal]                            | 0.05 – 3             | 200 mA g <sup>-1</sup>                                               | 1223 / 674                                                            | 326                                              | 50              | [14]      |
| Nanoparticles<br>[hydrothermal]                                                                    | 0.05 – 3             | 50 mA g <sup>-1</sup>                                                | - / -                                                                 | 521                                              | 40              | [15]      |
| Nano size Zn <sub>2</sub> SnO <sub>4</sub> /C<br>[hydrothermal]                                    | 0.05 – 3             | 60 mA g <sup>-1</sup>                                                | 1436.8 / 880.5                                                        | 564                                              | 40              | [16]      |
| Zn <sub>2</sub> SnO <sub>4</sub> @C/CSs<br>[hydrothermal]                                          | 0.01 – 3             | 100 mA g <sup>-1</sup>                                               | 1242 / 775                                                            | 680                                              | 345             | [17]      |
| Zn <sub>2</sub> SnO <sub>4</sub> @ZIF core-shell<br>[hydrothermal]                                 | 0.01 – 3             | 0.5 A g <sup>-1</sup>                                                | 1125.7 / 369.2                                                        | 349.2                                            | 20              | [18]      |
| Cubic<br>[supercritical water]                                                                     | 0.05 – 3             | 0.75 mA cm <sup>-2</sup>                                             | 1526 / 1093                                                           | 856                                              | 50              | [21]      |
| Nanowire<br>[vapor transport method]                                                               | 0.005 – 1.5<br>– 3.0 | 120 mA g <sup>-1</sup>                                               | 1650 / 670<br>/ 1000                                                  | 390 (0.005 – 1.5V)<br>660 (0.005 – 3V)           | 50              | [23]      |
| Cubic<br>[hydrothermal]                                                                            | 0.05 – 3             | 100 mA g <sup>-1</sup>                                               | 1509 / -                                                              | 580                                              | 50              | [24]      |
| Irregular<br>[hydrothermal]                                                                        | 0.05 – 3             | 50 mA g <sup>-1</sup>                                                | 1903.6 / 1045.5                                                       | 645                                              | 20              | [25]      |
| Cubic<br>[solid state reaction]                                                                    | 0.05 – 3             | 50 mA g <sup>-1</sup>                                                | 2054 / 1025                                                           | 689                                              | 50              | [26]      |
| Cubic<br>[hydrothermal]                                                                            | 0.05 – 3             | 50 mA g <sup>-1</sup>                                                | 1437 / 921                                                            | 775                                              | 20              | [27]      |
| Carbon coated Zn <sub>2</sub> SnO <sub>4</sub><br>[hydrothermal]                                   | 0.05 – 3             | 200 mA g <sup>-1</sup>                                               | 1248.8 / 873.2                                                        | 341                                              | 45              | [28]      |
| Hollow Zn <sub>2</sub> SnO <sub>4</sub> boxes@C<br>[calcined process]                              | 0.01 – 2             | 300 mA g <sup>-1</sup>                                               | - / 616                                                               |                                                  | 45              | [29]      |
| Spherical Zn <sub>2</sub> SnO <sub>4</sub> @C core-shell<br>[spray pyrolysis]                      | 0.001 – 3            | 1 A g <sup>-1</sup>                                                  | 1526 / 873                                                            | 770                                              | 120             | This work |
